1 **Two step PCR method to exchange the resistance cassette of a**  
2 **vector**

3 Nils Cremer and Anne Diehl

4

5 Department of NMR-supported structural Biology, Leibniz-Forschungsinstitut für Molekulare  
6 Pharmakologie (FMP), Robert-Rössle-Str. 10, 13125 Berlin, Germany

7

8 Correspondence: [diehl@fmp-berlin.de](mailto:diehl@fmp-berlin.de)

9 Keywords: ligation independent cloning, exchange antibiotic resistance, protein expression

10 Abstract: 50 words

11 Manuscript: 859 words

12

13

14

15

16

17

18

19

20

21 **Abstract**

22 For co-transformation of two plasmids, both have to possess different antibiotic selection markers. If  
23 that is not the case, normally the gene of interest (GOI) is subcloned into another vector. Here we  
24 introduce a fast and easy method to exchange the antibiotic resistance cassette (ARC) in only two  
25 PCR steps.

26 **Method Summary**

27 To shuttle the antibiotic resistance cassette (ARC) from one vector to another, one can amplify the  
28 ARC of interest and use the resulting PCR-product as a primer pair for the next amplification step.  
29 Simply remove parental DNA template by *DpnI* digestion, transform PCR product directly in *E. coli*  
30 *cells*, select transformants on an appropriate agar plate and isolate target vector by plasmid  
31 preparation.

32

33

34

35

36

37

38

39

40

41

42 Progress in structural biology depends on properly folded and functional recombinant proteins. After  
43 completion of the big structural genomics projects the low hanging fruits for *E. coli* expression have  
44 been almost entirely achieved. The challenge now is to produce difficult-to-express proteins in an  
45 improved *E. coli* environment, as this host is the easiest and cheapest one to handle with respect to  
46 NMR-labelling. One possibility is to optimize *E. coli* protein homeostasis by initiation of stress by  
47 sigma factor 32 (1). The appropriate plasmid pBAD.Sigma32.I54N (Figure 1A) carrying ampicillin  
48 resistance can be obtained via Addgene from Jeff Kelly. Sigma 32 causes the up-regulation of  
49 proteostasis network components like chaperones, folding enzymes or proteases. We have used that  
50 system surprisingly well for stable expression of an intrinsic unfolded protein with improved yield.  
51 Encouraged by that, we now want to use it for soluble expression of proteins with a high tendency to  
52 form inclusion bodies. Unfortunately most of our constructs have ampicillin as the selection marker,  
53 making co-transformation with pBAD.Sigma32.I54N impossible due to resistance being the same.  
54 Instead of re-cloning all our constructs we decided to change the antibiotic resistance cassette (ARC)  
55 of pBAD.Sigma32.I54N. A common pET26b vector (69862, Merck, Germany) was chosen as a  
56 template for the kanamycin ARC (Figure 1B). Initially both ARCs with their flanking regions were  
57 analyzed using alignments with respect to homolog regions in both directions. Indeed a reverse  
58 complimentary sequence downstream the ampicillin ARC of pBAD.Sigma32.I54N is identical to a  
59 sequence upstream the kanamycin ARC of pET26b and vice versa. Therefore two XL primers were  
60 synthesized (BioTez, Berlin, Germany) according to Table 1. With these primers the ampicillin ARC  
61 downstream of the sigma 32 and with the same translational orientation will be replaced by the  
62 kanamycin ARC in the opposite direction (Figure 1C). The reverse orientation is recommended for  
63 the kanamycin ARC (2).

64 The forward primer with 56 nucleotides matches to 100 % in both vectors and the reverse primer  
65 with 55 nucleotides fits to 71 % (39 nucleotides underlined part Table 1) to pET26b and 100 % to  
66 pBAD.Sigma32.I54N. If those identical stretches do not exist, the XL-primer can be designed by taking  
67 in 5'-3' direction 25-30 nucleotides from the ARC flanking site of the target vector (in our case

68 pBAD.Sigma32.I54N) combined with 25-30 nucleotides of the donor vector (in our case pET26b) to  
69 amplify first the ARC of interest and then introduce the resulting PCR product into the target vector  
70 via a second PCR. The possibility of changing the orientation of the ARC is then given via a  
71 combination of up- and downstream parts of donor and target vector, respectively, in the forward  
72 primer and vice versa for the reverse primer.

73 For both PCR reactions the KOD Hot Start DNA Polymerase Kit (71086, Merck, Germany) was used.

74 The first PCR with pET26b as template and donor for the kanamycin ARC was performed as follows in

75 a 50  $\mu$ l set up: 1x KOD buffer; 2 mM MgSO<sub>4</sub>; 0.2 mM each of the 4 NTP's; 0.3  $\mu$ M of both primer;

76 0.5 ng/ $\mu$ l pET26b, 0.02 U/ $\mu$ l KOD Polymerase. The following PCR program was used:

|    |                |                 |   |     |
|----|----------------|-----------------|---|-----|
| 77 | <u>95 °C</u>   | <u>5:00 min</u> |   |     |
| 78 | 94 °C          | 0:30 min        | ← | 5x  |
| 79 | 45 °C          | 1:00 min        |   |     |
| 80 | <u>72 °C</u>   | <u>2:00 min</u> |   |     |
| 81 | 94 °C          | 0:30 min        | ← |     |
| 82 | 45/50 or 55 °C | 1:00 min        |   | 13x |
| 83 | <u>72 °C</u>   | <u>2:00 min</u> |   |     |
| 84 | 68 °C          | 8:00            |   |     |
| 85 | 4 °C           | hold            |   |     |

86 The expected PCR product of about 1000 bp was separated on a 0.8 % agarose gel (Figure 2a) and  
87 purified (LSKGEL050, Montage Gel Extraction Kit, Millipore, USA) for use as a primer pair in the final  
88 PCR step.

89 The second PCR to exchange the ampicillin ARC by the amplified kanamycin ARC in

90 pBAD.Sigma32.I54N was set up as the first PCR, but with the double amount of KOD polymerase and

91 6  $\mu$ l of 1 kB PCR product with 40 ng/ $\mu$ l (final 7.2 nM) as primers. The cycling program was extended.

|    |              |                 |   |    |
|----|--------------|-----------------|---|----|
| 92 | <u>95 °C</u> | <u>5:00 min</u> |   |    |
| 93 | 94 °C        | 0:30 min        | ← | 5x |
| 94 | 60 °C        | 1:00 min        |   |    |
| 95 | <u>68 °C</u> | <u>6:00 min</u> |   |    |
|    |              |                 |   |    |

|     |       |           |     |
|-----|-------|-----------|-----|
| 96  | 94 °C | 0:30 min  | ←   |
| 97  | 55 °C | 1:00 min  | 13x |
| 98  | 68 °C | 6:00 min  |     |
| 99  | 68 °C | 24:00 min |     |
| 100 | 4 °C  | hold      |     |

101 After digestion of the template plasmid with *DpnI* at 37°C for 1 hour and heat inactivation for 5 min  
102 at 80 °C 2 µl of the treated PCR product was used to transform NovaBlue GigaSingles competent cells  
103 (71227, Merck, Germany) according to NovaBlue transformation protocol (3). Within 12 to 18 hours  
104 transformants grew on kanamycin but not on ampicillin selection plates.

105 In principle this result was proof enough that the kanamycin resistance cassette has been inserted  
106 correctly into the target vector. Additionally, using Sanger sequencing (Source Bioscience, UK) we  
107 demonstrated that pBAD.Sigma32.I54N-kana still carries the gene for Sigma factor.

108 Furthermore we analyzed plasmid preparations of six clones by restriction digest (Figure 2B).

109 The robustness of the method is very good, as the first PCR was successful in a broad window of  
110 annealing temperatures, many transformants were produced, six analyzed clones possessed all the  
111 expected digestion patterns and code for sigma32. An unwanted CT doubling in the middle of the  
112 reverse primer had not influenced the result negatively, as untranslated flanking regions were used  
113 as primer pairing positions and some mismatches are tolerated.

114

#### 115 **Author contributions**

116 N.C. performed the experiments. A.D. design the work, including the primer. N.C and AD wrote the  
117 manuscript.

118

#### 119 **Acknowledgement**

120 pBAD.Sigma32.I54N was a gift from Jeffery Kelly (Addgene plasmid # 59982). We thank Catherine L.

121 Worth (FMP) for reading the manuscript.

122

### 123 **Competing interests**

124 The authors declare no competing interests.

125

126

127

128

### 129 **References**

130 **1. Zhang X, Liu Y, Genereux JC, Nolan C, Singh M and Kelly JW. (2014) The Heat-Shock**  
131 **Response Transcriptional Program Enables High-Yield and High-Quality Recombinant Protein**  
132 **Production in Escherichia coli. ACS Chem Biol. 2014 Jul 22. 10.1021/cb500447**

133 **2. Novagen: pET System Manual TB055 8<sup>th</sup> Edition 02/99**

134 **3. NovaBlue GigaSingles TB360**

135

136 **Table 1. Primer for 1. PCR and their corresponding sites in vectors used.**

| primer  | sequence                                                         | pET26b    | pBAD.Sigma32.I54N |
|---------|------------------------------------------------------------------|-----------|-------------------|
| forward | 5'CTTTGATCTTTTCTACGGGGTCTGACGCTC<br>AGTGGAACGAAAACCTCACGTTAAGG3' | 3872-3926 | 4000-3946         |
| reverse | 5'GCGTTTCTACAAACTCTTTGTTTATTTTC<br>TAAATACATTCAAATATGTATCCGC3'   | 4854-4816 | 2868-2923         |

137

138 **Figure 1. Plasmid maps** (Vector NTI, Fisher Scientific , UK). A) pBAD.Sigma32.I54N with ampicillin  
139 ARC, B) pET26b donor of the kanamycin ARC und C) the resulting pBAD.Sigma32.I54N-kana. Used  
140 restriction sites are indicated.

141 **Figure 2. Analysis by agarose gels** A) Products of 3 parallel set ups for the first PCR with different  
142 annealing temperatures (Ta) analyzed in a 1.5 % agarose gel. Lane 1: 18 cycles with Ta 45 °C; Lane 2:  
143 5 cycles with Ta at 45 °C, followed by 13 cycles with Ta of 50 °C; Lane 3: 5 cycles with Ta at 45 °C,  
144 followed by 13 cycles with Ta of 55 °C; M1: 1kB Marker (SM0331, Thermo Fisher Scientific) B)  
145 Restriction digest of pBAD.Sigma32.I54N and pBAD.Sigma32.I54N-kana analyzed by 0.8 % agarose  
146 gel. Marker and all “fast digest enzymes” from Thermo Fischer Scientific Lane 1: pBAD.Sigma32.I54N  
147 (4812 bp) digested with *Bam*HI (FD0054) and *Sma*I (FD0663) is only linearized as expected as it  
148 possess no cleavage site for *Sma*I; Lane 2a-f: 6 clones of pBAD.Sigma32.I54N-kana digested with  
149 *Bam*HI and *Sma*I showed the expected fragments of 2878 and 1934 bp; Lane 3a und b: 2 clones of  
150 pBAD.Sigma32.I54N-kana digested with *Bam*HI and *Ava*I (FD0384, cleaves inside the kanamycin  
151 cassette and within the regulator gene *ara*C) formed 3 fragments (1932, 1795, 1085 bp) as predicted;  
152 M1: 1kB Marker (SM0331) M2 Fast ruler Middle range with 5000, 2000, 850 400 and 100 bp  
153 (SM1113); M3 Lambda DNA/ *Eco*130I (SM0161).

A

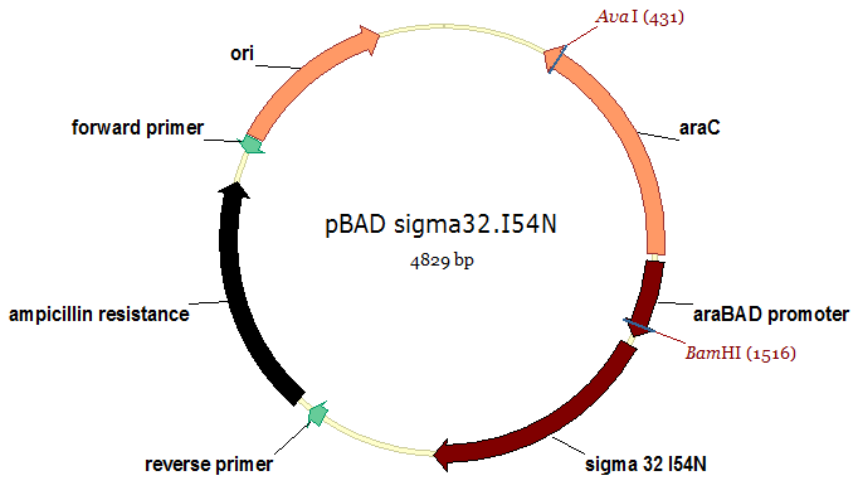

B

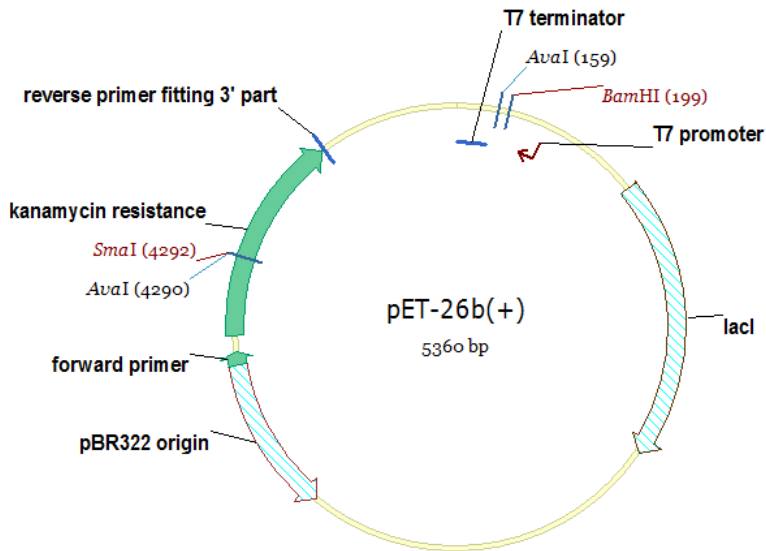

C

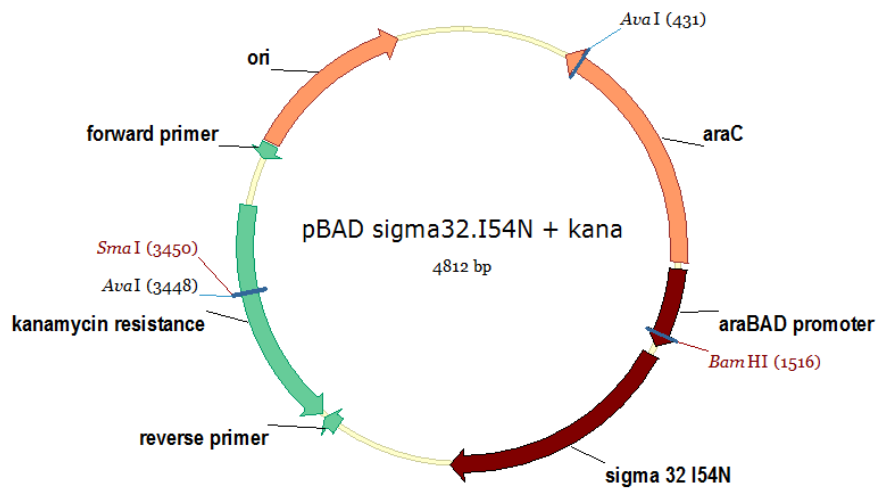



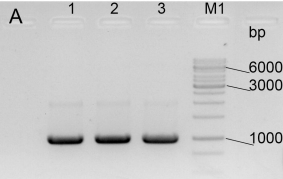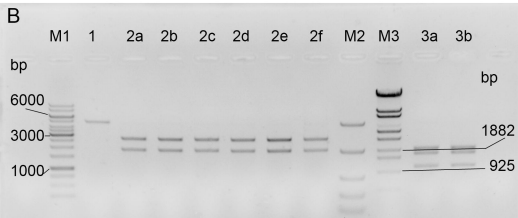

Source: https://www.biorxiv.org/content/10.1101/2021.01.28.428618v1.full.pdf
